# Supplementary material
Source: MDPI journal article supplement (https://www.mdpi.com/2076-3417/12/4/2149)
Supplement: s1 [file s1]

# Long-Term and Seasonal Changes in Sources of Urban Atmospheric Particulates in The Western Pacific

Kazuichi Hayakawa<sup>1\*</sup>, Ning Tang<sup>2</sup> and Akira Toriba<sup>3</sup>

<sup>1</sup>Low Level Radioactivity Laboratory, Institute of Nature and Environmental Technology, Kanazawa University, O-24 Wake-machi, Nomi, Ishikawa, 923-1224 Japan

<sup>2</sup>Institute of Nature and Environmental Technology, Kanazawa University, Kakuma-machi, Kanazawa, Ishikawa, 920-1192 Japan

<sup>3</sup>Graduate School of Biomedical Sciences, Nagasaki University, 1-14 Bunkyo-cho, Nagasaki, 852-8521 Japan

## Text 1. Determination of PAHs and NPAHs

An area of each quartz fiber filter containing atmospheric total suspended particulate matter (TSP) was cut into small pieces in a glass flask, and an internal standard solution including Pyr-*d*<sub>10</sub>, 1-NP-*d*<sub>9</sub> and 2-fluoro-7-nitrofluorene (FNF) was added. PAHs, NPAHs and internal standards were extracted with benzene/ethanol (3:1, v/v), and the organic solution was successively washed with diluted solutions of sodium hydroxide and sulfuric acid, and finally with distilled water. After the organic solution was evaporated to dryness, the residue was dissolved in a small volume of ethanol. The solution was used for high-performance liquid chromatographic (HPLC) quantification of PAHs and NPAHs.

Nine PAHs, fluoranthene (FR), pyrene (Pyr), benz[*a*]anthracene (BaA), chrysene (Chr), benzo[*b*]fluoranthene (BbF), benzo[*k*]fluoranthene (BkF), benzo[*a*]pyrene (BaP), benzo[*ghi*]perylene (BghiPe) and indeno[1,2,3-*cd*]pyrene (IDP), were quantified using an HPLC equipped with a fluorescence detector (Shimadzu LC10A series). The analytical column was a reversed phase column (Inertsil ODS-P, 4.6 i.d. × 250 mm, GL Science Inc., Tokyo, Japan). The mobile phase was a mixture of acetonitrile/water. The time program for fluorescence detection was set at the optimum excitation and emission wavelengths. HPLC conditions were according to the United States Environmental Protection Agency methods [1] with several modifications. Pyr-*d*<sub>10</sub> was used as the internal standard for the quantification.

Six NPAHs, 9-nitroanthracene (9-NA), 1-nitropyrene (1-NP), 6-nitrocrysene (6-NC), 7-nitrobenz[*a*]anthracene (7-NBaA), 3-nitroperylene (3-NPer) and 6-nitrobenzo[*a*]pyrene (6-NBaP), were quantified using an HPLC equipped with a reducing column packed with platinum/rhodium and a chemiluminescence detector. The analytical columns were reversed-phase columns (Cosmosil 5C18-MS-II, 4.6 i.d. (250 + 150) mm, Nacalai Tesque, Kyoto, Japan). The mobile phase was a mixture of an imidazole buffer and acetonitrile. The chemiluminescence reagent solution was an acetonitrile solution containing bis(2,4,6-trichlorophenyl)oxalate and hydrogen peroxide. 1-NP-*d*<sub>9</sub> and FNF were used as internal standards for quantification. More detailed HPLC conditions were described in our previous reports with limits of quantification [2-4]. The recoveries of NPAHs varied between 87% and 104%, with limits of detection (S/N = 3) that varied between 0.25 and 1.5 fmol, and limits of quantification (S/N = 10) that varied between 10<sup>-15</sup> and 10<sup>-12</sup> (over two orders of magnitude).<sup>5</sup>

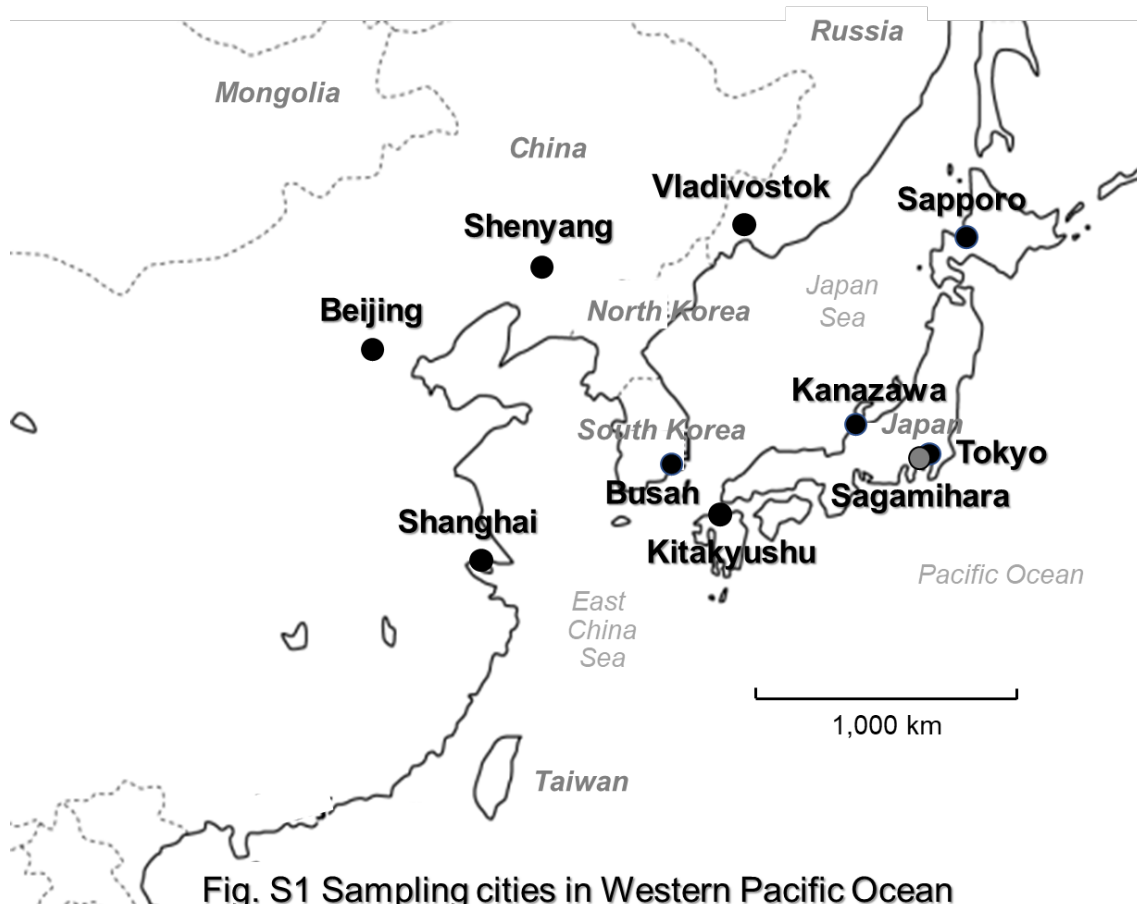

**Fig. S1** Sampling cities in Western Pacific Ocean

**Figure S1.** Sampling cities in Western Pacific Ocean.

**Table S1.** Characteristics of the sampled cities.

| City       | Location            | Population | Avg. temp. (°C) |        | Characteristics                                                              |
|------------|---------------------|------------|-----------------|--------|------------------------------------------------------------------------------|
|            | Latitude, Longitude |            | Summer          | Winter |                                                                              |
| Sapporo    | 36°33'N, 136°40'E   | 1,970,000  | 22.3            | −3.6   | Capital of Hokkaido prefecture, Japan; Commercial city                       |
| Kanazawa   | 36°33'N, 136°40'E   | 460,000    | 27.0            | 3.8    | Capital of Ishikawa prefecture, Japan; Commercial city                       |
| Tokyo      | 36°33'N, 136°40'E   | 1,400,000  | 26.4            | 5.2    | Capital of Japan; Biggest city in Japan; Commercial city                     |
| Sagamihara | 36°33'N, 136°40'E   | 270,000    | 26.7            | 5.9    | Satellite city of Tokyo; Commercial city                                     |
| Kitakyushu | 33°53'N, 130°53'E   | 940,000    | 27.4            | 5.8    | Industrial city (Iron manufacture)                                           |
| Shenyang   | 41°37'N, 123°25'E   | 8,250,000  | 24.6            | −12.0  | Capital of Liaoning province, China; Commercial city; Coal heating in winter |
| Beijing    | 39°54'N, 116°24'E   | 21,700,000 | 25.8            | −4.6   | Capital of China; Commercial city; Coal heating in winter                    |
| Shanghai   | 31°13'N, 116°24'E   | 24,300,000 | 27.8            | 3.5    | Economic and financial center of China, Commercial city                      |

|             |                      |           |      |       |                                              |
|-------------|----------------------|-----------|------|-------|----------------------------------------------|
| Vladivostok | 43°06'N,<br>131°52'E | 630,000   | 21.2 | −12.1 | Capital of Primorsky Krai, Russia; Port city |
| Busan       | 35°06'N,<br>129°02'E | 3,490,000 | 25.9 | 3.2   | Second biggest city in Korea; Port city      |

**Table S2.** Atmospheric concentrations of TSP, 1-NP and Pyr in 10 cities from 1997 to 2018.

| Year/Season <sup>c</sup> | [TSP], $\mu\text{gm}^{-3}$ | [1-NP], $\text{fmol m}^{-3}$ | [Pyr], $\text{pmol m}^{-3}$ |
|--------------------------|----------------------------|------------------------------|-----------------------------|
| Sapporo                  |                            |                              |                             |
| 1997S                    | ND <sup>b</sup>            | 120                          | 0.99                        |
| 1997W                    | ND <sup>b</sup>            | 570                          | 5.1                         |
| 2004S                    | 33                         | 22                           | 0.65                        |
| 2005W                    | 23                         | 94                           | 2.1                         |
| 2007S                    | 34                         | 20                           | 0.32                        |
| 2008W                    | 32                         | 150                          | 4.3                         |
| 2010S                    | 37                         | 11                           | 0.25                        |
| 2010W                    | 29                         | 72                           | 2.7                         |
| 2013S                    | 15                         | 3.6                          | 0.19                        |
| 2014W                    | 13                         | 43                           | 1.0                         |
| Kanazawa                 |                            |                              |                             |
| 1997S                    | ND <sup>2</sup>            | 180                          | 1.0                         |
| 1997W                    | ND <sup>b</sup>            | 480                          | 2.9                         |
| 1999S                    | 34                         | 180                          | 1.2                         |
| 1999W                    | 56                         | 480                          | 2.5                         |
| 2004S                    | 31                         | 91                           | 0.82                        |
| 2005W                    | 29                         | 97                           | 1.0                         |
| 2007S                    | 39                         | 42                           | 0.53                        |
| 2008W                    | 24                         | 51                           | 1.7                         |
| 2010S                    | 28                         | 15                           | 0.4                         |
| 2010W                    | 28                         | 43                           | 1.5                         |
| 2013S                    | 42                         | 18                           | 0.54                        |
| 2014W                    | 34                         | 26                           | 2.0                         |
| 2017S                    | 18.2                       | 6.0                          | 0.40                        |
| 2018W                    | 21.6                       | 11.9                         | 1.07                        |
| Tokyo                    |                            |                              |                             |
| 1997S                    | ND <sup>b</sup>            | 48                           | 0.78                        |
| 1997W                    | ND <sup>b</sup>            | 280                          | 3.3                         |
| 2004S                    | 29                         | 22                           | 0.52                        |
| 2005W                    | 31                         | 46                           | 1.2                         |
| Sagamihara               |                            |                              |                             |
| 2007S                    | 46                         | 15                           | 0.44                        |
| 2008W                    | 21                         | 25                           | 1.1                         |
| 2010S                    | 34                         | 5.3                          | 0.09                        |
| 2010W                    | 35                         | 35                           | 1.4                         |
| 2013S                    | 42                         | 5.8                          | 1.3                         |
| 2014W                    | 39                         | 25                           | 1.5                         |
| Kitakyushu               |                            |                              |                             |
| 1997S                    | ND <sup>b</sup>            | 16                           | 1.5                         |
| 1997W                    | ND <sup>b</sup>            | 55                           | 2.8                         |
| 2004S                    | 40                         | 22                           | 3.0                         |
| 2005W                    | 38                         | 70                           | 2.0                         |
| 2007S                    | 29                         | 5.2                          | 0.22                        |
| 2008W                    | 27                         | 29                           | 2.0                         |
| 2010S                    | 24                         | 13                           | 0.88                        |
| 2010W                    | 52                         | 37                           | 2.2                         |
| 2013S                    | 20                         | 1.9                          | 0.30                        |
| 2014W                    | 21                         | 31                           | 8.7                         |

|       |                 |             |      |
|-------|-----------------|-------------|------|
|       |                 | Shenyang    |      |
| 2001S | 114             | 150         | 3.0  |
| 2002W | 194             | 720         | 250  |
| 2007S | 151             | 170         | 7.5  |
| 2008W | 171             | 790         | 74   |
| 2010S | 177             | 96          | 2.7  |
| 2010W | 171             | 730         | 37   |
| 2013S | 88              | 90          | 6.0  |
| 2014W | 178             | 760         | 110  |
|       |                 | Beijing     |      |
| 2004W | 171             | 740         | 170  |
| 2007S | 757             | 78          | 4.9  |
| 2008W | 211             | 680         | 100  |
| 2010S | 96              | 48          | 2.5  |
| 2010W | 207             | 440         | 290  |
| 2013S | 125             | 32          | 2.4  |
| 2014W | 667             | 260         | 81   |
|       |                 | Shanghai    |      |
| 2007S | 84              | 150         | 1.1  |
| 2007W | 107             | 150         | 2.9  |
| 2010S | 81              | 34          | 0.75 |
| 2010W | 154             | 200         | 5.6  |
| 2013S | 34              | 19          | 0.74 |
| 2014W | 128             | 170         | 13   |
| 2015S | ND <sup>d</sup> | 7.7         | 1.1  |
| 2015W | ND <sup>d</sup> | 47          | 5.4  |
| 2017S | ND <sup>d</sup> | 17          | 0.54 |
| 2018W | ND <sup>d</sup> | 36          | 4.2  |
|       |                 | Vladivostok |      |
| 1999S | ND <sup>d</sup> | 17          | 0.49 |
| 1999W | ND <sup>d</sup> | 460         | 24   |
| 2005W | ND <sup>d</sup> | 290         | 16   |
| 2007S | 95              | 19          | 0.86 |
| 2008W | 80              | 350         | 26   |
| 2010S | 41              | 19          | 1.0  |
| 2010W | 73              | 340         | 52   |
| 2013S | 50              | 6.0         | 0.27 |
| 2014W | 80              | 150         | 8.1  |
|       |                 | Busan       |      |
| 2005W | 44              | 84          | 2.5  |
| 2007S | 62              | 20          | 0.37 |
| 2008W | 39              | 91          | 4.0  |
| 2010S | 34              | 12          | 0.54 |
| 2010W | 50              | 56          | 5.2  |

---

<sup>c</sup>Season: S, Summer; W, Winter. <sup>d</sup>ND: No data. Atmospheric concentrations of TSP, 1-NP and Pyr were cited from our previous reports [5-7].

Table S3 x and y values for 10 cities from 1997 to 2018.

| Year/ Season  | x            | y            |
|---------------|--------------|--------------|
|               | Sapporo      |              |
| 1997 S        | 0.903        | -            |
| 1997 W        | 0.893        | -            |
| 2004 S        | 0.651        | 0.015        |
| 2005 W        | 0.721        | 0.084        |
| 2007 S        | 0.795        | 0.011        |
| <b>2008 W</b> | <b>0.659</b> | <b>0.105</b> |
| 2010 S        | 0.716        | 0.006        |
| 2010 W        | 0.590        | 0.061        |
| 2013 S        | 0.491        | 0.007        |
| 2014 W        | 0.710        | 0.069        |
|               | Kanazawa     |              |
| 1997 S        | 0.948        | -            |
| 1997 W        | 0.940        | -            |
| 1999 S        | 0.929        | 0.087        |
| 1999 W        | 0.954        | 0.199        |
| 2004 S        | 0.891        | 0.050        |
| 2005 W        | 0.871        | 0.058        |
| 2007 S        | 0.837        | 0.020        |
| 2008 W        | 0.618        | 0.050        |
| 2010 S        | 0.680        | 0.012        |
| 2010 W        | 0.543        | 0.041        |
| 2013 S        | 0.644        | 0.010        |
| 2014 W        | 0.385        | 0.027        |
| 2017 S        | 0.492        | 0.018        |
| 2018 W        | 0.343        | 0.033        |
|               | Tokyo        |              |
| 1997 S        | 0.792        | -            |
| 1997 W        | 0.850        | -            |
| 2004 S        | 0.758        | 0.014        |
| 2005 W        | 0.776        | 0.027        |
|               | Sagamihara   |              |
| 2007 S        | 0.639        | 0.007        |
| 2008 W        | 0.884        | 0.020        |
| 2010 S        | 0.763        | 0.002        |
| 2010 W        | 0.559        | 0.026        |
| 2013 S        | 0.141        | 0.009        |
| 2014 W        | 0.454        | 0.020        |
|               | Kitakyushu   |              |
| 1997 S        | 0.341        | -            |
| 1997 W        | 0.506        | -            |
| 2004 S        | 0.239        | 0.029        |
| 2005 W        | 0.659        | 0.041        |
| 2007 S        | 0.557        | 0.005        |
| 2008 W        | 0.425        | 0.035        |
| 2010 S        | 0.425        | 0.018        |
| 2010 W        | 0.460        | 0.022        |
| 2013 S        | 0.208        | 0.001        |
| 2014 W        | 0.105        | 0.134        |
|               | Shenyang     |              |
| 2001 S        | 0.745        | 0.026        |
| 2002 W        | 0.075        | 0.405        |
| 2007 S        | 0.545        | 0.030        |
| 2008 W        | 0.341        | 0.182        |
| 2010 S        | 0.666        | 0.012        |
| 2010 W        | 0.506        | 0.121        |
| 2013 S        | 0.425        | 0.034        |
| 2014 W        | 0.227        | 0.231        |
|               | Beijing      |              |

|             |       |       |
|-------------|-------|-------|
| 2004 W      | 0.138 | 0.334 |
| 2007 S      | 0.443 | 0.003 |
| 2008 W      | 0.223 | 0.177 |
| 2010 S      | 0.491 | 0.014 |
| 2010 W      | 0.008 | 0.420 |
| 2013 S      | 0.390 | 0.009 |
| 2014 W      | 0.088 | 0.039 |
| Shanghai    |       |       |
| 2007 S      | 0.918 | 0.030 |
| 2007 W      | 0.754 | 0.028 |
| 2010 S      | 0.721 | 0.009 |
| 2010 W      | 0.666 | 0.029 |
| 2013 S      | 0.580 | 0.014 |
| 2014 W      | 0.385 | 0.020 |
| 2015 S      | 0.233 | -     |
| 2015 W      | 0.284 | -     |
| 2017 S      | 0.637 | -     |
| 2018 W      | 0.278 | -     |
| Vladivostok |       |       |
| 1999 S      | 0.659 | -     |
| 1999 W      | 0.491 | -     |
| 2005 W      | 0.476 | -     |
| 2007 S      | 0.533 | 0.005 |
| 2008 W      | 0.385 | 0.156 |
| 2010 S      | 0.491 | 0.013 |
| 2010 W      | 0.214 | 0.264 |
| 2013 S      | 0.533 | 0.004 |
| 2014 W      | 0.491 | 0.054 |
| Busan       |       |       |
| 2005 W      | 0.651 | 0.043 |
| 2007 S      | 0.762 | 0.006 |
| 2008 W      | 0.545 | 0.062 |
| 2010 S      | 0.533 | 0.010 |
| 2010 W      | 0.341 | 0.044 |

$x$  ( $= [Ph]/[P_c]$ ) and  $y$  ( $= [P_c]/[TSP]$ ) were calculated from Table S2 by equations (i) and (ii) in the text. Blank means not calculated.

## References

1. Wise, S.; Phinney, K.; Sander, L.; Schaz, M. Review: Role of chromatography in the development of standard reference materials for organic analysis. *J Chromatogr A*, 2012, 1261, 3-22. <http://dx.doi.org/10.1016/j.chroma.2012.05.093>.
2. Hayakawa, K.; Kitamura, R.; Butoh, M.; Imaizumi, N.; Miyazaki, M. Determination of diamino- and aminopyrenes by high-performance liquid chromatography with chemiluminescence detection. *Anal. Sci.*, 1991, 7, 573-577. <https://doi.org/10.2116/analsci.7.573>
3. Hayakawa, K.; Murahashi, T.; Butoh, M.; Miyazaki, M. Determination of 1,3-, 1,6-, and 1,8-dinitropyrenes and 1-nitropyrene in urban air by high-performance liquid chromatography using chemiluminescence detection. *Environ. Sci. Technol.*, 1995, 29, 928-932. <https://doi.org/10.1021/es00004a012>
4. Tang, N.; Taga, R.; Hattori, T.; Toriba, A.; Kizu, R.; Hayakawa, K. Simultaneous determination of twenty-one mutagenic nitropolycyclic aromatic hydrocarbons by high-performance liquid chromatography with chemiluminescence detection. *Proceedings of the 13th International Symposium, Bioluminescence and Chemiluminescence Progress and Perspective*, ed. by A. Tsuji et al., 2005, World Science, London, pp. 441-444. ISBN-10: 9812561188
5. Hayakawa, K.; Tang, N.; Nagato, E. G.; Toriba, A.; Sakai, S.; Kano, F.; Goto, S.; Endo, O.; Arashidani, K.; Kakimoto, H. Long term trends in atmospheric concentrations of polycyclic aromatic hydrocarbons and nitropolycyclic aromatic hydrocarbons: A study of Japanese cities from 1997 to 2014. *Environ. Pollut.*, 2018, 233, 474-482. <https://doi.org/10.1016/j.envpol.2017.10.038>
6. Hayakawa, K.; Tang, N.; Nagato, E.; Toriba, A.; Lin, J.-M.; Zhao, L.; Zhou, Z.; Qing, W.; Yang X.; Mishukov, V.; Neroda, A.; Chung, H.-Y. Long-term trends in urban atmospheric polycyclic aromatic hydrocarbons and nitropolycyclic aromatic hydrocarbons: China, Russia and Korea from 1999 to 2014, *Int. J. Environ. Public Health*, 2020, 17, 431-443. <https://doi.org/10.3390/ijerph17020431>
7. Yang, L.; Zhang, X.; Xing, W.; Zhou, Q.; Zhang, L.; Wu, Q.; Zhou, Z.; Chen, R.; Toriba, A.; Hayakawa, K.; Tang, N. Yearly variation in characteristics and health risk of polycyclic aromatic hydrocarbons and nitro-PAHs in urban Shanghai from 2010–2018, *J. Environ. Sci.*, 2021, 99, 72-79. <https://doi.org/10.1016/j.jes.2020.06.017>
